# Supplementary material for: Dichloroacetate improves systemic energy balance and feeding behavior during sepsis
Source: JCI journal article supplement (doi:10.1172/jci.insight.153944), 2022-06-21
Supplement: sd1 [file 1]

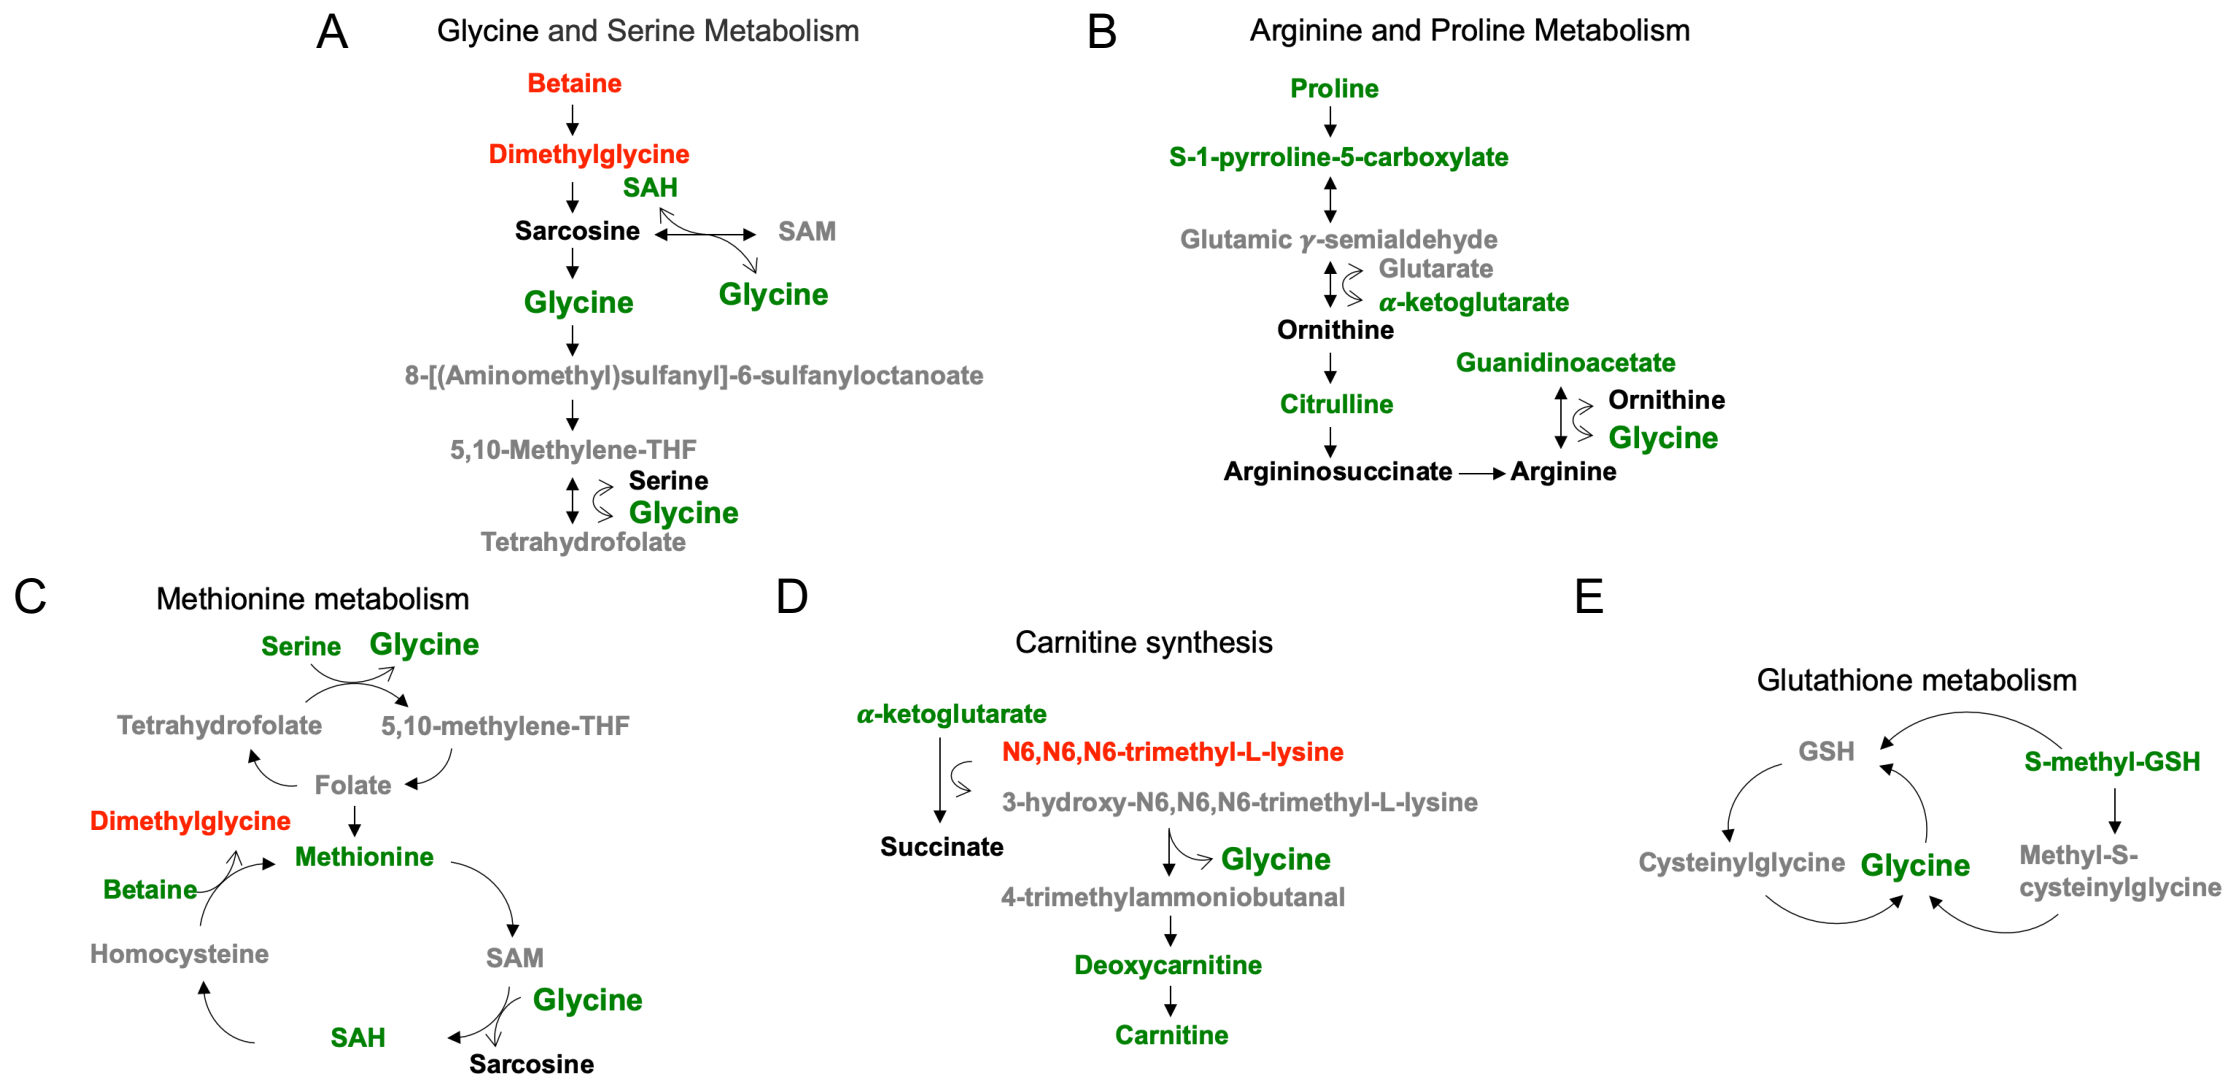

**Fig. S1. Changes in circulating metabolites involved in glycine deficiency in response to sepsis. (A-E)** Schematic representation of plasma metabolites contributing to glycine depletion during chronic sepsis. Red denotes a metabolite increased in response to sepsis; green indicates a metabolite decreased in response to sepsis; black indicates a metabolite unchanged in response to sepsis; grey indicates a metabolite not measured in our metabolomic screening.

### Glycine and serine metabolism

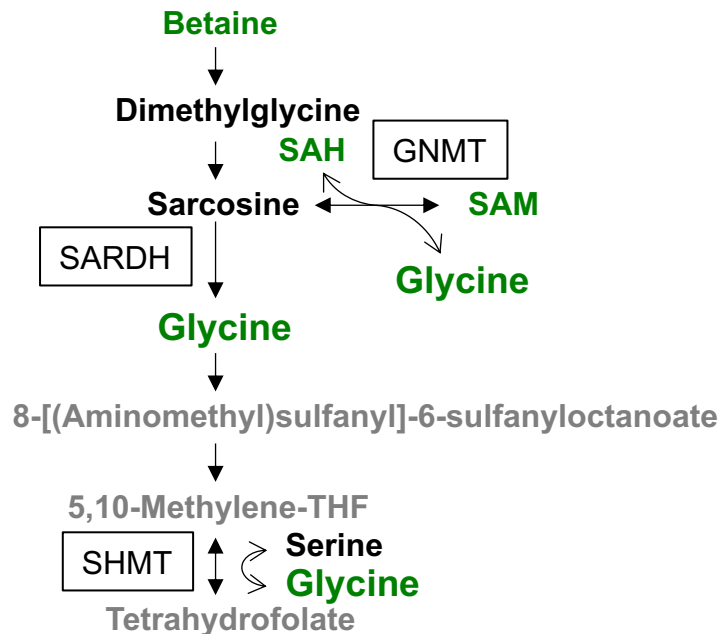

**Fig. S2. Enzymes that lead to glycine deficiency during sepsis.** Enzymes involved in glycine synthesis are shown in rectangle in the glycine and serine metabolic pathway. Green indicates a metabolite decreased in response to sepsis; black indicates a metabolite unchanged in response to sepsis; grey indicates a metabolite not measured in our metabolomic screening.

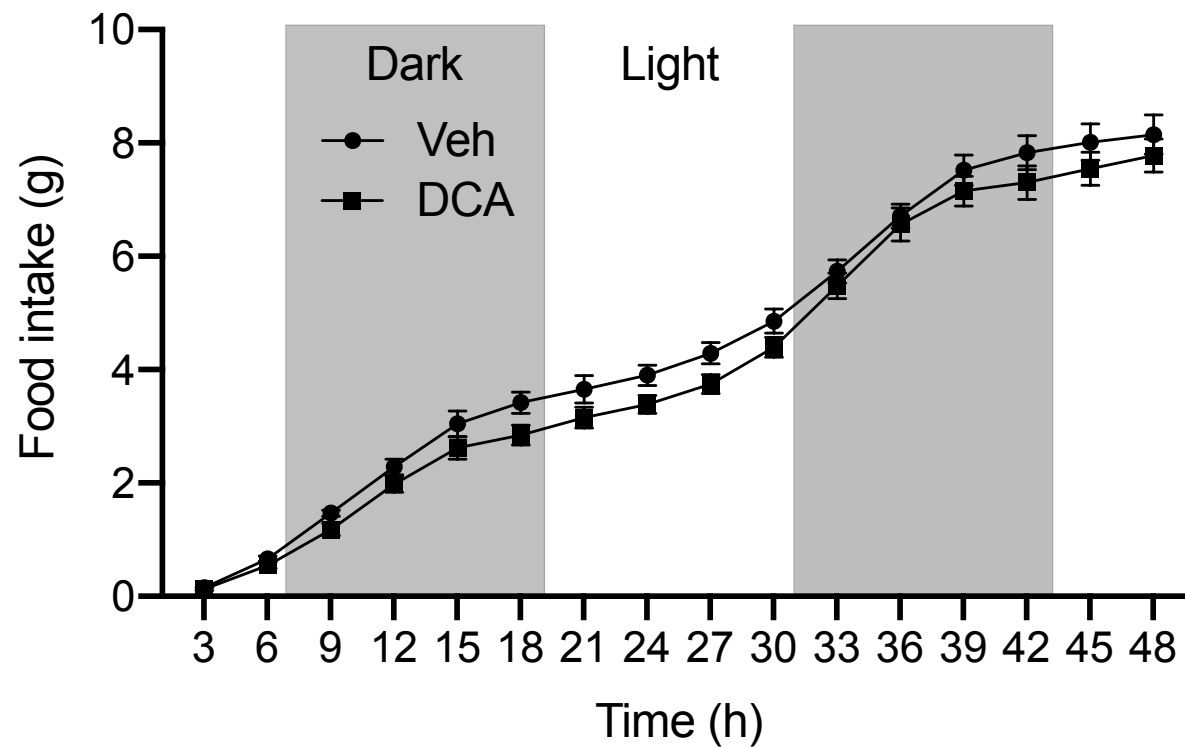

**Fig. S3. Food intake after DCA administration.** Mice were individually housed and food intake was measured every 3 h for 2 days after intraperitoneal administration of vehicle (Veh) or dichloroacetate (DCA). n = 5 mice per group.

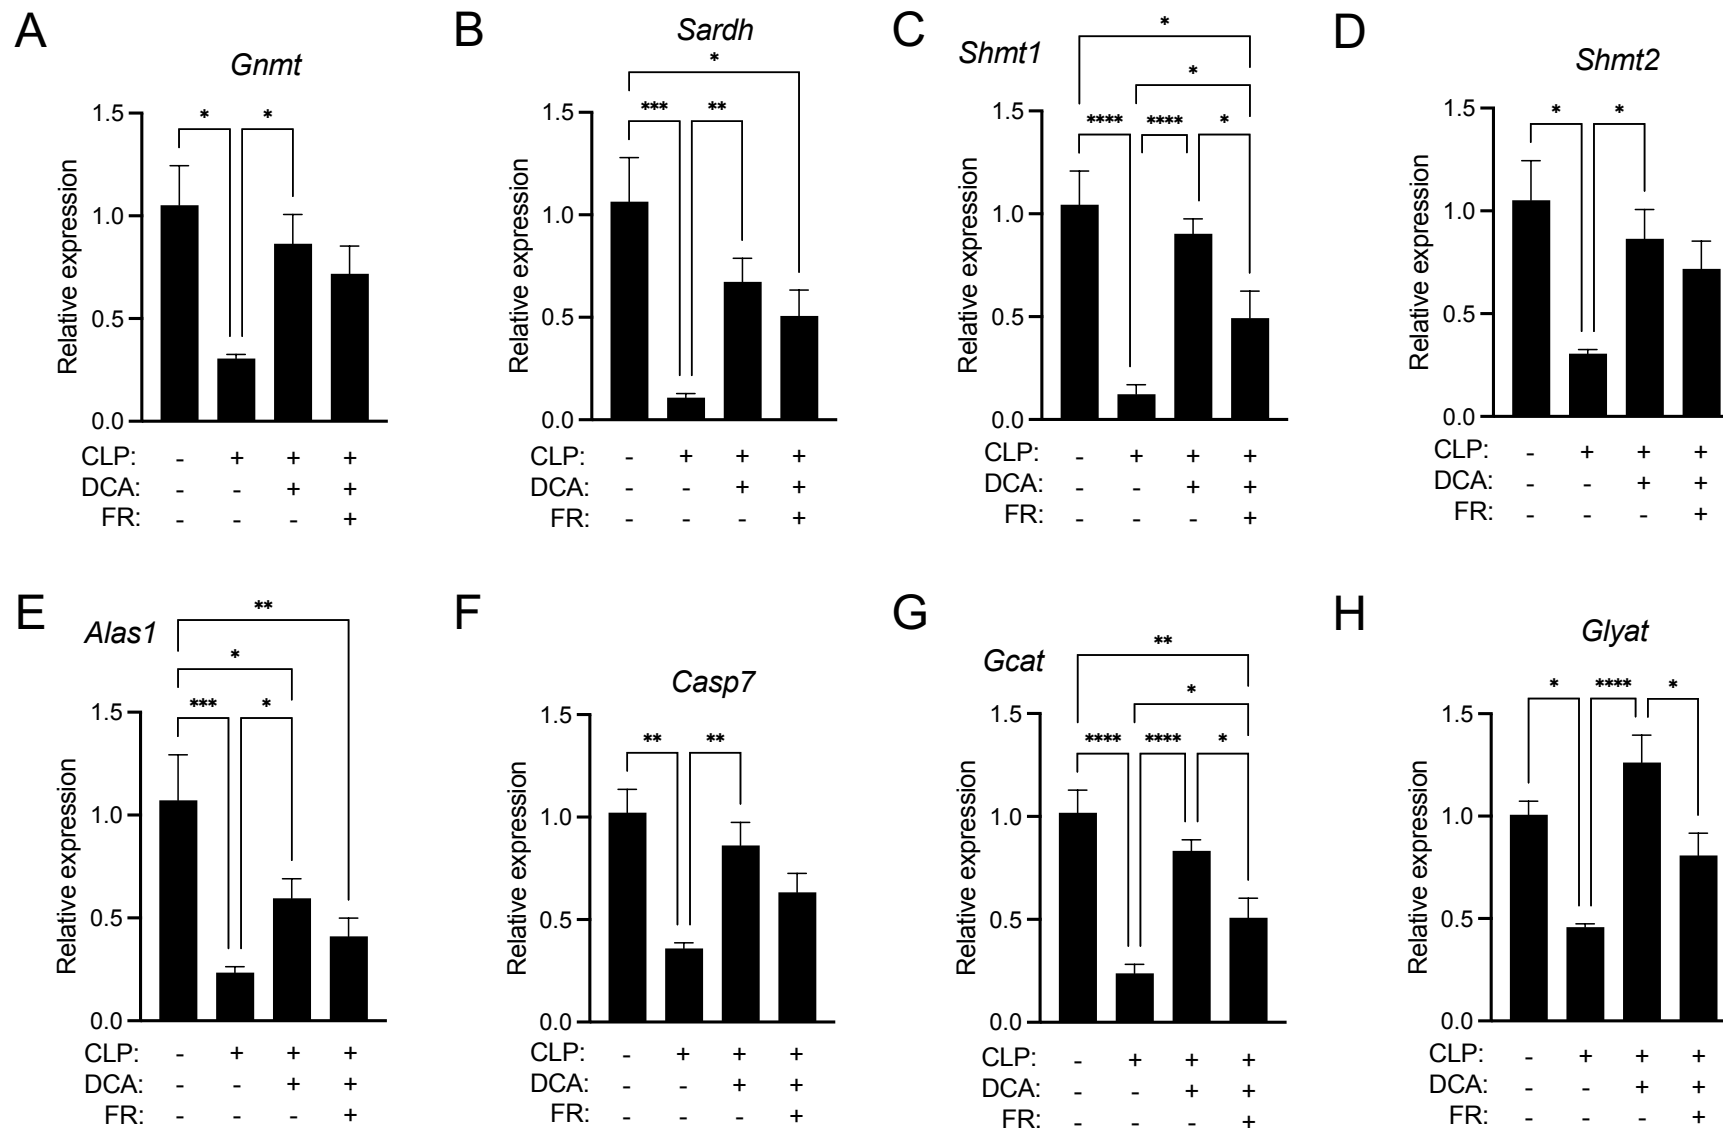

**Fig. S4. Hepatic gene expression involved in glycine metabolism in response to CLP, DCA and food restriction.** (A-H) Relative gene expression involved in glycine metabolism assessed by qRT-PCR from livers of sham, CLP, CLP+DCA, and CLP+DCA+Food restriction (FR) 30 h post-surgery (n = 4 sham; 8-10 CLP; 8-10 CLP+DCA; 10 CLP+DCA+FR). \* $p < 0.05$ , \*\* $p < 0.01$ , \*\*\* $p < 0.001$ , \*\*\*\* $p < 0.0001$ .

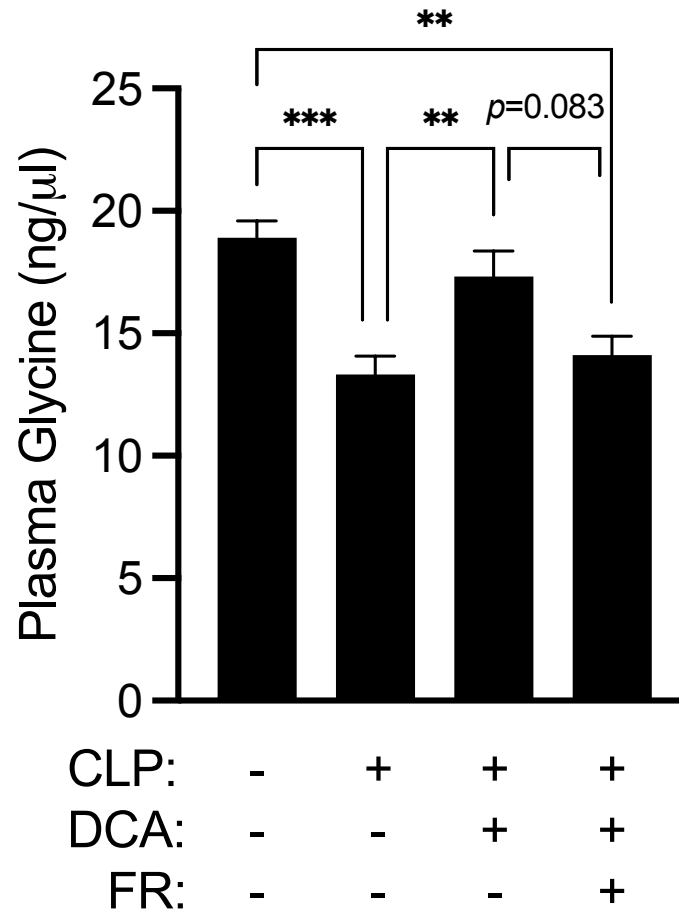

**Fig. S5. Alterations in circulating glycine levels in response to CLP, DCA and food restriction.** Glycine levels were measured by glycine assay kits from plasma of sham, CLP, CLP+DCA, and CLP+DCA+Food restriction (FR) 30 h post-surgery (n = 8 sham; 13 CLP; 9 CLP+DCA; 7 CLP+DCA+FR). Values outside of lower outlier gate and upper outlier gate were removed from analysis (See Statistics for detail). \*\* $p < 0.01$ , \*\*\* $p < 0.001$ .
